# Supplementary material
Source: PubMed Central journal article supplement (PMC9478885)

## TECHNICAL APPENDIX

### **Additional Model Structure Details**

The 15-day cycle length was used in the model as a conservative estimate to adequately cover both fidaxomicin and bezlotoxumab populations and to maintain consistency when modeling the population, as the recommended course of antibiotic therapies, including vancomycin and fidaxomicin, is usually 10-14 days [1]. We limited this to the initial 6 months since recurrent CDI episodes attributed to the same infectious strains rarely occur beyond 6 months after the initial episode [2]. Lifetime horizon was used to incorporate the permanent impact of colectomy.

Although different definitions for initial and sustained clinical cure were used in the clinical trials, all trials used decreased stool frequency and/or improved stool consistency at the end of the first treatment courses as an indicator of initial clinical cure, and defined patients without recurrence during the follow-up period as having sustained clinical cure [3-6]. Therefore, although the actual dates of assessment are slightly different among trials, it is assumed that these definitions were sufficiently consistent for comparing their outcomes due to data limitations. The sustained cure rates estimated on Day 90 in Guery et al were used as global sustained cure rates to capture the most patients [7]. Patients in clinical failure were assumed to take second-line vancomycin taper therapy, an alternative vancomycin therapy commonly used when other therapies fail [2]. Patients with 1<sup>st</sup> and 2<sup>nd</sup> recurrent CDI episodes were again treated with their initially assigned therapy in the initial episode, and were assumed to receive vancomycin taper therapy once they experienced the 3<sup>rd</sup> recurrent episode, regardless of previous treatment success and failure. Due to lack of data and

for model clarity, we assumed all patients had a maximum of 3 recurrent CDI episodes [8]. During the initial 6 months (biweekly cycles), the probability of progressing to death was explained by a combination of background mortality and 6-month CDI-attributable mortality, while only background mortality was applied after the model progressed into annual cycles (beyond 6 months) [9,10]. Post-colectomy, we included colectomy-specific mortality in addition to background and CDI-attributable mortality [11].

There were some key differences between our model and that of Prabhu et al. First, in Prabhu et al, mild/moderate CDI and severe CDI were assumed to experience different clinical cure rates, and only patients with severe CDI could potentially receive colectomy [2]. While it was confirmed by clinical guideline recommendations that colectomy should be performed only on severely ill patients with fulminant CDI when surgical management was necessary [12], all CDI patients were assumed to go through the same pathway in our model. This was mainly due to the data limitation in bezlotoxumab trial, where clinical cure rates and recurrence rates were not reported specifically in mild/moderate CDI and severe CDI subgroups [1]. Additionally, the fundamental definitions of clinically severe CDI used in randomized trials were different, and the severe CDI population was thus still heterogeneous even if we modeled it separately from mild/moderate CDI population [3-6]. As a result, we decided to model the same health states for all CDI patients. As an alternative, we incorporated the impact of severe CDI by adjusting disease utility according to severe CDI proportion in population.

Furthermore, our model did not include post clinical failure state like Prabhu et al did. Prabhu et al assumed that patients with clinical failure, defined as no respond after one course of treatment, may be further treated in post clinical failure

state and would eventually be cured if they did not progress to death [2]. However, our clinicians suggested that clinical failure was usually due to slow response of patients, and dosage boost were often administered in this case. Based on clinical observations, clinicians estimated that all patients with the correct diagnosis and consistent use of vancomycin will respond within 2-4 weeks. We therefore excluded the post clinical failure state in our model and assumed that all patients with clinical failure would get vancomycin taper for 4 weeks as dosage boost, regardless of which treatment they used previously, and all patients would move to clinical cure after 2-4 weeks if they did not progress to death during this period.

Fecal microbiota transplantation (FMT) is an emerging treatment for recurrent CDI, and articles also suggest that FMT is the preferred and the most cost-saving option [12]. However, due to limited data on prices, clinical rates and utility values of varying methods of FMT so far, modeling FMT treatment would be very difficult and would require a very large number of assumptions. As a result, we decided that incorporating FMT based on current literature is not ideal and FMT was excluded from the model.

Although metronidazole was also sometime used as standard therapy for CDI, clinical practice guidelines for CDI always recommend vancomycin over metronidazole for adult CDI patients as long as the access to vancomycin was not limited [1]. Previous randomized trial showed that oral vancomycin was superior to metronidazole with regard to initial and sustained clinical response, and metronidazole was also not recommended to be used for more than one course because of the potential for cumulative neurotoxicity [1]. Therefore, we also excluded metronidazole from the analysis and used oral vancomycin as the only standard therapy.

The original assumption of the model was 1) biweekly cycle for the initial 6 months and 2) annual cycle for the remaining life. However, due to the fact that only post-colectomy, sustained cure and death states had cycle length of one year, and the fact that some proportion of the patients remain in 3<sup>rd</sup> recurrence or clinical cure from that episode by the end of the 6<sup>th</sup> month, pseudo-biweekly cycles were used to mimic annual cycles in model calculation until all patients enter long term stages. In the pseudo-biweekly cycle part, the original annual probabilities were transferred into biweekly probabilities using DEALE method [13,14]. Costs and QALYs were also deducted to meet the length of each cycle.

### **Additional Input Parameter Details**

The data for standard fidaxomicin and vancomycin was calculated from the weighted average of reported numbers from Cornely et al and Louie et al [4,5]. The specific probabilities of sustained clinical cure for initial episodes and recurrent episodes with bezlotoxumab plus vancomycin were assumed to be the same as vancomycin because of data limitations in Wilcox et al and based on the assumption that the effectiveness of bezlotoxumab plus vancomycin was at minimum equivalent to that of vancomycin [3]. Similarly, the probabilities of sustained clinical cure with extended-pulsed fidaxomicin were assumed to be the same as standard fidaxomicin due to data limitations in Guery et al [6].

There are no clinical trials comparing fidaxomicin against bezlotoxumab directly. However, since fidaxomicin trials compared fidaxomicin against vancomycin, and bezlotoxumab trial also compared bezlotoxumab against standard therapy which included vancomycin, we did an adjustment to data of Wilcox et al to mimic the head-to-head comparison [3-5]. Assuming that the effect of standard therapy in Wilcox et al equals the effect of vancomycin, and that the vancomycin

efficacy was constant, the calculation used following equation to obtain the adjusted values of bezlotoxumab probabilities: (Adjusted Bezlotoxumab Probabilities = Original Bezlotoxumab Probabilities / Original Vancomycin Probabilities in Bezlotoxumab Trial \* Original Vancomycin Probabilities in Fidaxomicin Trials). Similar adjustment of Guery et al data was also conducted using the following equation: (Adjusted Extended Fidaxomicin Probabilities = Original Extended Fidaxomicin Probabilities / Original Vancomycin Probabilities in Extended Fidaxomicin Trial \* Original Vancomycin Probabilities in Standard Fidaxomicin Trials) [6].

Sustained clinical cure rates from recurrent episodes were reported in randomized trials without specifying numbers of patients' recurrences [3-6]. In order to calculate specific sustained clinical cure rates from 1<sup>st</sup>, 2<sup>nd</sup> and 3<sup>rd</sup> recurrent episodes, we assumed that the reported value in literature was a sum up of all sub probabilities: (sustained cure from 1<sup>st</sup> recurrence + sustained cure from 2<sup>nd</sup> recurrence + sustained cure from 3<sup>rd</sup> recurrence = reported value of sustained clinical cure from recurrences in literature). Additionally, as clinicians suggested, we further assumed that (sustained cure from a<sup>th</sup> recurrence = sustained cure from [a-1]<sup>th</sup> episode \* percentage increase of recurrence rate from [a-1]<sup>th</sup> to a<sup>th</sup>, a=2, 3). The sustained clinical cure rates from 1<sup>st</sup>, 2<sup>nd</sup> and 3<sup>rd</sup> recurrent episodes were then calculated by solving the two equations.

Indirect costs in this model came from time loss attributable to CDI symptoms and its treatments. Our clinicians first estimated that a typical outpatient visit for CDI would take a patient 2 hours. Moreover, the time loss of inpatient CDI was calculated from one-third of attributable hospitalization length reported in Zhang et al, assuming that patients only utilize one-third of their total time to work [15]. The general time

loss attributable to CDI was calculated by adjusting inpatient and outpatient time loss with population proportion of inpatient CDI cases. Finally, according to the administration guidelines, we assumed that bezlotoxumab be administered through a 60-minute intravenous infusion [16]. All time loss was then multiplied by civilian compensation rate to gain the final indirect costs.

The utility measurement of CDI was not well established among literature. Consequently, the utility values used by previous cost-effectiveness analyses were considerably different, and thus we made reasonable adjustments to the derived utility values. First, the baseline utility from Bartsch et al was adjusted by proportion of patients who aged 65+ years [17]. Second, we took the disutility of CDI states from Prabhu et al, adjusted by proportion of severe CDI, and then multiplied the disutility by the baseline utility to calculate the final value of diseased utility [2]. As colectomy was performed on severe CDI patients only and took less than one week to complete, we further assumed the utility of colectomy was the same as that of severe disease. The utility of colectomy was calculated using the disutility of severe CDI and not adjusted by any proportion.

Finally, following the assumption in Lam et al, the utility of post-colectomy was produced based on the same assumption in Hayes et al and the EQ-5D-5L utility value of United States population due to a lack of relative data [18-20]. Hayes et al used the assumed values according to EuroQol Group's EQ-5D-3L health state classification system to represent utilities of patients in post-colectomy state [19]. EQ-5D-3L defines utilities in five dimensions and three possible levels of experience: 1, no problems; 2, moderate problems; and 3, extreme problems. Hayes et al assumed that post-colectomy patients were at level 2 for all five dimensions and produced the associated utility value [19]. We applied similar assumption on EQ-5D-5L, in which

utilities were defined in five possible levels of experience instead of three: 1, no problems; 2, slight problems; 3, moderate problems; 4, severe problems; and 5, extreme problems. We assumed that post-colectomy patients in our model were at level 3 for all dimensions and derived the associated United States specific value from Pickard et al [20].

| Description                                   | Base Value | Range         | Distribution | Reference |
|-----------------------------------------------|------------|---------------|--------------|-----------|
| Sustained clinical cure, 1st Recurrence, VAN  | 0.254      | 0.203 - 0.305 | Beta         | [4,5]     |
| Sustained clinical cure, 1st Recurrence, FDX  | 0.384      | 0.307 - 0.461 | Beta         | [4,5]     |
| Sustained clinical cure, 1st Recurrence, BEZ  | 0.254      | 0.203 - 0.305 | Beta         | N/A *     |
| Sustained clinical cure, 1st Recurrence, EPFX | 0.384      | 0.307 - 0.461 | Beta         | N/A **    |
| Sustained clinical cure, 2nd Recurrence, VAN  | 0.193      | 0.155 - 0.232 | Beta         | [4,5]     |
| Sustained clinical cure, 2nd Recurrence, FDX  | 0.245      | 0.196 - 0.294 | Beta         | [4,5]     |
| Sustained clinical cure, 2nd Recurrence, BEZ  | 0.193      | 0.155 - 0.232 | Beta         | N/A *     |
| Sustained clinical cure, 2nd Recurrence, EPFX | 0.245      | 0.196 - 0.294 | Beta         | N/A **    |
| Sustained clinical cure, 3rd Recurrence, VAN  | 0.140      | 0.112 - 0.168 | Beta         | [4,5]     |
| Sustained clinical cure, 3rd Recurrence, FDX  | 0.110      | 0.088 - 0.132 | Beta         | [4,5]     |
| Sustained clinical cure, 3rd Recurrence, BEZ  | 0.140      | 0.112 - 0.168 | Beta         | N/A *     |
| Sustained clinical cure, 3rd Recurrence, EPFX | 0.110      | 0.088 - 0.132 | Beta         | N/A **    |
| Background mortality, year 3                  | 0.012      | 0.010 - 0.015 | Beta         |           |
| Background mortality, year 4                  | 0.013      | 0.011 - 0.016 | Beta         |           |
| Background mortality, year 5                  | 0.014      | 0.012 - 0.017 | Beta         |           |
| Background mortality, year 6                  | 0.016      | 0.013 - 0.019 | Beta         |           |
| Background mortality, year 7                  | 0.017      | 0.014 - 0.020 | Beta         |           |
| Background mortality, year 8                  | 0.018      | 0.015 - 0.022 | Beta         |           |
| Background mortality, year 9                  | 0.020      | 0.016 - 0.024 | Beta         |           |
| Background mortality, year 10                 | 0.022      | 0.018 - 0.027 | Beta         |           |
| Background mortality, year 11                 | 0.024      | 0.019 - 0.029 | Beta         | [21]      |
| Background mortality, year 12                 | 0.027      | 0.021 - 0.032 | Beta         |           |
| Background mortality, year 13                 | 0.029      | 0.024 - 0.035 | Beta         |           |
| Background mortality, year 14                 | 0.033      | 0.026 - 0.039 | Beta         |           |
| Background mortality, year 15                 | 0.036      | 0.029 - 0.043 | Beta         |           |
| Background mortality, year 16                 | 0.040      | 0.032 - 0.048 | Beta         |           |
| Background mortality, year 17                 | 0.044      | 0.035 - 0.053 | Beta         |           |
| Background mortality, year 18                 | 0.049      | 0.039 - 0.059 | Beta         |           |
| Background mortality, year 19                 | 0.055      | 0.044 - 0.066 | Beta         |           |

|                               |       |       |   |       |      |
|-------------------------------|-------|-------|---|-------|------|
| Background mortality, year 20 | 0.061 | 0.049 | - | 0.073 | Beta |
| Background mortality, year 21 | 0.068 | 0.054 | - | 0.082 | Beta |
| Background mortality, year 22 | 0.076 | 0.060 | - | 0.091 | Beta |
| Background mortality, year 23 | 0.084 | 0.067 | - | 0.101 | Beta |
| Background mortality, year 24 | 0.094 | 0.075 | - | 0.113 | Beta |
| Background mortality, year 25 | 0.105 | 0.084 | - | 0.126 | Beta |
| Background mortality, year 26 | 0.117 | 0.094 | - | 0.140 | Beta |
| Background mortality, year 27 | 0.131 | 0.105 | - | 0.157 | Beta |
| Background mortality, year 28 | 0.146 | 0.117 | - | 0.175 | Beta |
| Background mortality, year 29 | 0.162 | 0.130 | - | 0.194 | Beta |
| Background mortality, year 30 | 0.179 | 0.143 | - | 0.215 | Beta |
| Background mortality, year 31 | 0.198 | 0.158 | - | 0.238 | Beta |
| Background mortality, year 32 | 0.218 | 0.174 | - | 0.261 | Beta |
| Background mortality, year 33 | 0.238 | 0.190 | - | 0.285 | Beta |
| Background mortality, year 34 | 0.257 | 0.206 | - | 0.309 | Beta |
| Background mortality, year 35 | 0.276 | 0.221 | - | 0.331 | Beta |
| Background mortality, year 36 | 0.294 | 0.235 | - | 0.352 | Beta |
| Background mortality, year 37 | 0.310 | 0.248 | - | 0.372 | Beta |
| Background mortality, year 38 | 0.327 | 0.262 | - | 0.393 | Beta |
| Background mortality, year 39 | 0.345 | 0.276 | - | 0.414 | Beta |
| Background mortality, year 40 | 0.364 | 0.292 | - | 0.437 | Beta |
| Background mortality, year 41 | 0.385 | 0.308 | - | 0.462 | Beta |
| Background mortality, year 42 | 0.406 | 0.325 | - | 0.487 | Beta |
| Background mortality, year 43 | 0.429 | 0.343 | - | 0.514 | Beta |
| Background mortality, year 44 | 0.452 | 0.362 | - | 0.543 | Beta |
| Background mortality, year 45 | 0.478 | 0.382 | - | 0.573 | Beta |

---

Abbreviations: VAN, vancomycin; FDX, standard fidaxomicin; BEZ, bezlotoxumab plus vancomycin; EPFX, extended-pulsed fidaxomicin.

\* Assumed to be the same as vancomycin;

\*\* Assumed to be the same as standard fidaxomicin.

**APPENDIX TABLE 1: Additional Clinical Probability Inputs**



## APPENDIX REFERENCES

1. McDonald LC, Gerding DN, Johnson S, et al. Clinical Practice Guidelines for Clostridium difficile Infection in Adults and Children: 2017 Update by the Infectious Diseases Society of America (IDSA) and Society for Healthcare Epidemiology of America (SHEA). *Clin Infect Dis* **2018**; 66:987-994.
2. Prabhu VS, Dubberke ER, Dorr MB, et al. Cost-effectiveness of Bezlotoxumab Compared With Placebo for the Prevention of Recurrent Clostridium difficile Infection. *Clin Infect Dis* **2018**; 66:355-362.
3. Wilcox MH, Gerding DN, Poxton IR, et al. Bezlotoxumab for Prevention of Recurrent Clostridium difficile Infection. *N Engl J Med* **2017**; 376:305-317.6.
4. Cornely OA, Crook DW, Esposito R, et al. Fidaxomicin versus vancomycin for infection with Clostridium difficile in Europe, Canada, and the USA: a double-blind, non-inferiority, randomised controlled trial. *Lancet Infect Dis* **2012**; 12:281-289.
5. Louie TJ, Miller MA, Mullane KM, et al. Fidaxomicin versus vancomycin for Clostridium difficile infection. *N Engl J Med* **2011**; 364:422-431.
6. Guery B, Menichetti F, Anttila VJ, et al. Extended-pulsed fidaxomicin versus vancomycin for Clostridium difficile infection in patients 60 years and older (EXTEND): a randomised, controlled, open-label, phase 3b/4 trial. *Lancet Infect Dis* **2018**; 18:296-307.

7. Guery B, Menichetti F, Anttila VJ, et al. Extended-pulsed fidaxomicin versus vancomycin for *Clostridium difficile* infection in patients 60 years and older (EXTEND): a randomised, controlled, open-label, phase 3b/4 trial. *Lancet Infect Dis* **2018**; 18:296-307.
8. Kelly CP. Can we identify patients at high risk of recurrent *Clostridium difficile* infection. *Clin Microbiol Infect* **2012**; 18:21-27.
9. Hota SS, Achonu C, Crowcroft NS, Harvey BJ, Lauwers A, Gardam MA. Determining mortality rates attributable to *Clostridium difficile* infection. *Emerging Infect Dis* **2012**; 18:305-307.
10. Actuarial Life Table 2017. Social Security Administration. 2018. Available at <https://www.ssa.gov/oact/STATS/table4c6.html/>. Accessed September 30, 2020.
11. Stranges PM, Hutton DW, Collins CD. Cost-effectiveness analysis evaluating fidaxomicin versus oral vancomycin for the treatment of *Clostridium difficile* infection in the United States. *Value Health* **2013**; 16:297-304.
12. Varier RU, Biltaji E, Smith KJ, et al. Cost-effectiveness analysis of fecal microbiota transplantation for recurrent *Clostridium difficile* infection. *Infect Control Hosp Epidemiol* **2015**; 36:438-444.
13. Beck JR, Kassirer JP, Pauker SG. A convenient approximation of life expectancy (the "DEALE"). I. Validation of the method. *Am J Med* **1982**; 73:883–888.23.
14. Beck JR, Pauker SG, Gottlieb JE, Klein K, Kassirer JP. A convenient approximation of life expectancy (the "DEALE"). II. Use in medical decision-making. *Am J Med* **1982**; 73:889–897.
15. Zhang D, Prabhu VS, Marcella SW. Attributable Healthcare Resource Utilization and Costs for Patients With Primary and Recurrent *Clostridium difficile* Infection in the United States. *Clin Infect Dis* **2018**; 66:1326-1332.

16. ZINPLAVA™ (bezlotoxumab) injection, for intravenous use. Merck & CO., Inc. 2016. Available at [https://www.merck.com/product/usa/pi\\_circulars/z/zinplava/zinplava\\_pi.pdf/](https://www.merck.com/product/usa/pi_circulars/z/zinplava/zinplava_pi.pdf/). Accessed September 30, 2020.
17. Bartsch SM, Umscheid CA, Fishman N, Lee BY. Is fidaxomicin worth the cost? An economic analysis. *Clin Infect Dis* **2013**; 57:555-561.
18. Lam SW, Neuner EA, Fraser TG, Delgado D, Chalfin DB. Cost-effectiveness of three different strategies for the treatment of first recurrent *Clostridium difficile* infection diagnosed in a community setting. *Infect Control Hosp Epidemiol* **2018**; 39:924-930.
19. Hayes JL, Hansen P. Is laparoscopic colectomy for cancer cost-effective relative to open colectomy. *ANZ J Surg* **2007**; 77:782-786.
20. Pickard AS, Law EH, Jiang R, et al. United states valuation of EQ-5D-5L health states using an international protocol. *Value in Health* **2019**; 22:931-941.
21. Actuarial Life Table 2017. Social Security Administration. 2018. Available at <https://www.ssa.gov/oact/STATS/table4c6.html/>. Accessed September 30, 2020.

### One-way Sensitivity Analysis - Extended-pulsed Fidaxomicin vs Vancomycin

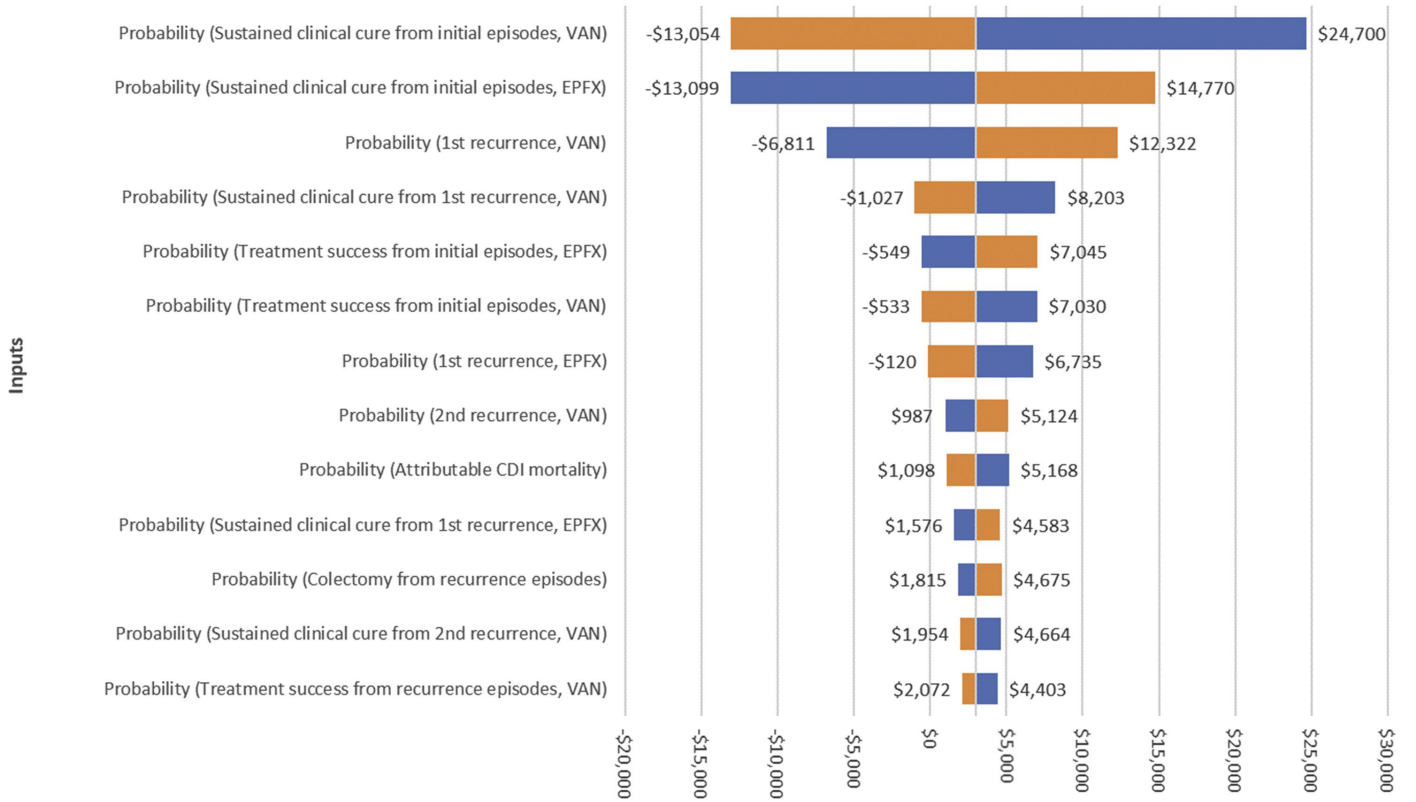

Incremental Net Monetary Benefit at Willingness-to-pay = \$150,000/Quality-adjusted Life Year

### One-way Sensitivity Analysis - Standard Fidaxomicin vs Vancomycin

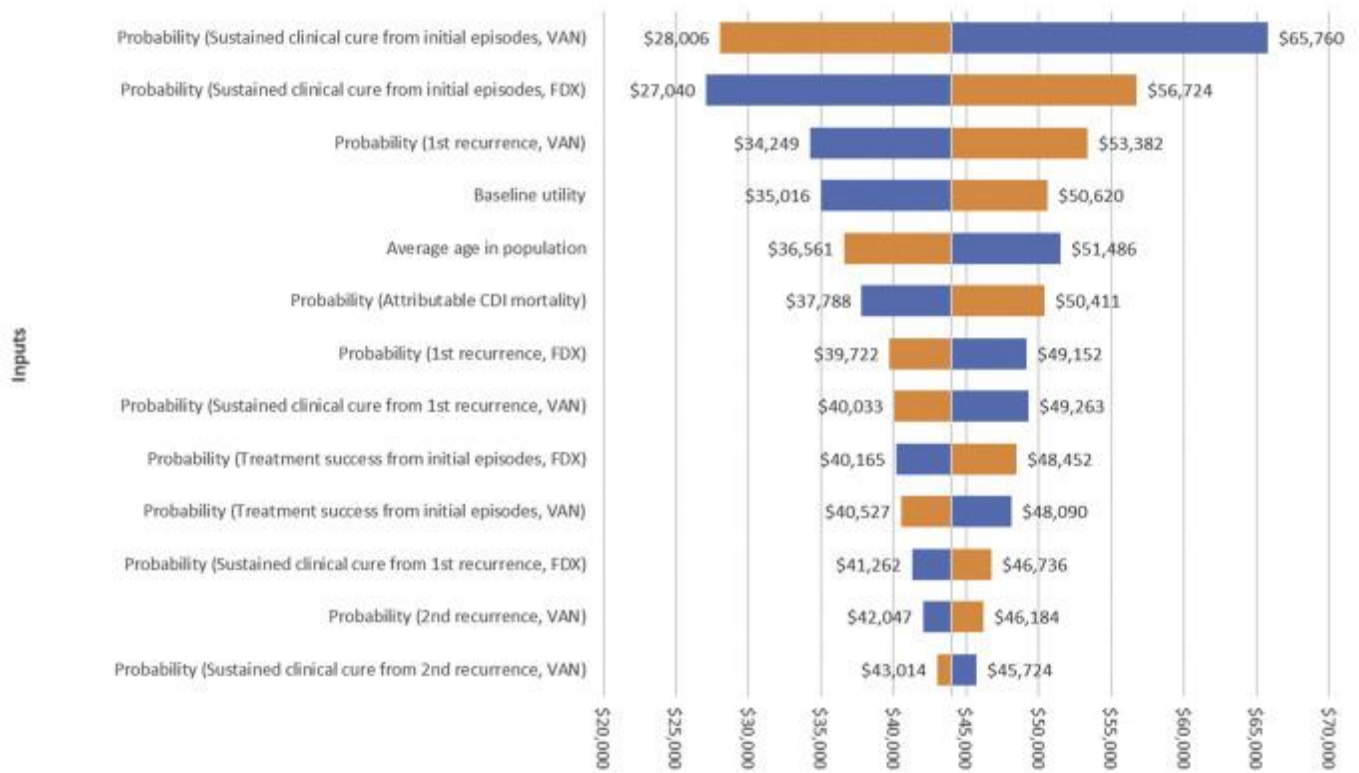

Incremental Net Monetary Benefit at Willingness-to-pay = \$150,000/Quality-adjusted Life Year

### One-way Sensitivity Analysis - Bezlotoxumab plus Vancomycin vs Vancomycin

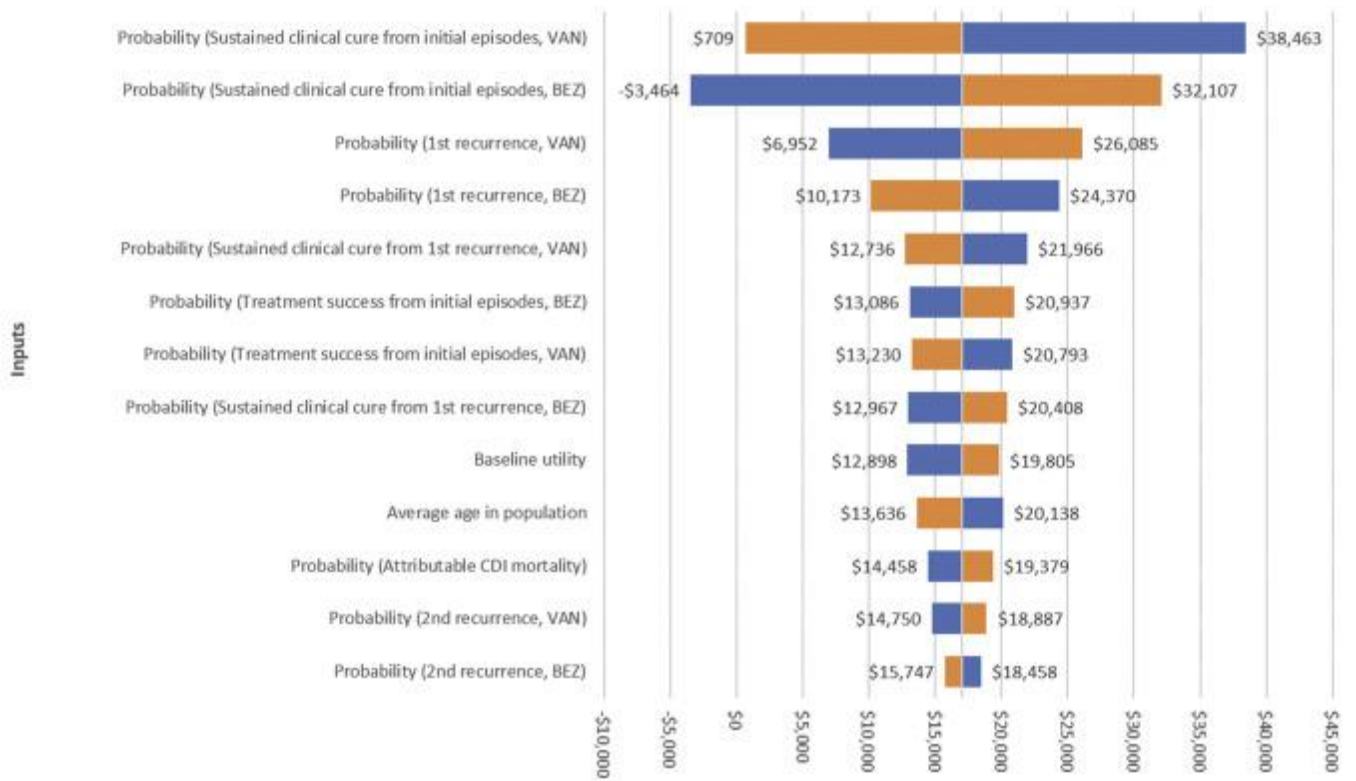

Incremental Net Monetary Benefit at Willingness-to-pay = \$150,000/Quality-adjusted Life Year

### One-way Sensitivity Analysis - Standard Fidaxomicin vs Extended-pulsed Fidaxomicin

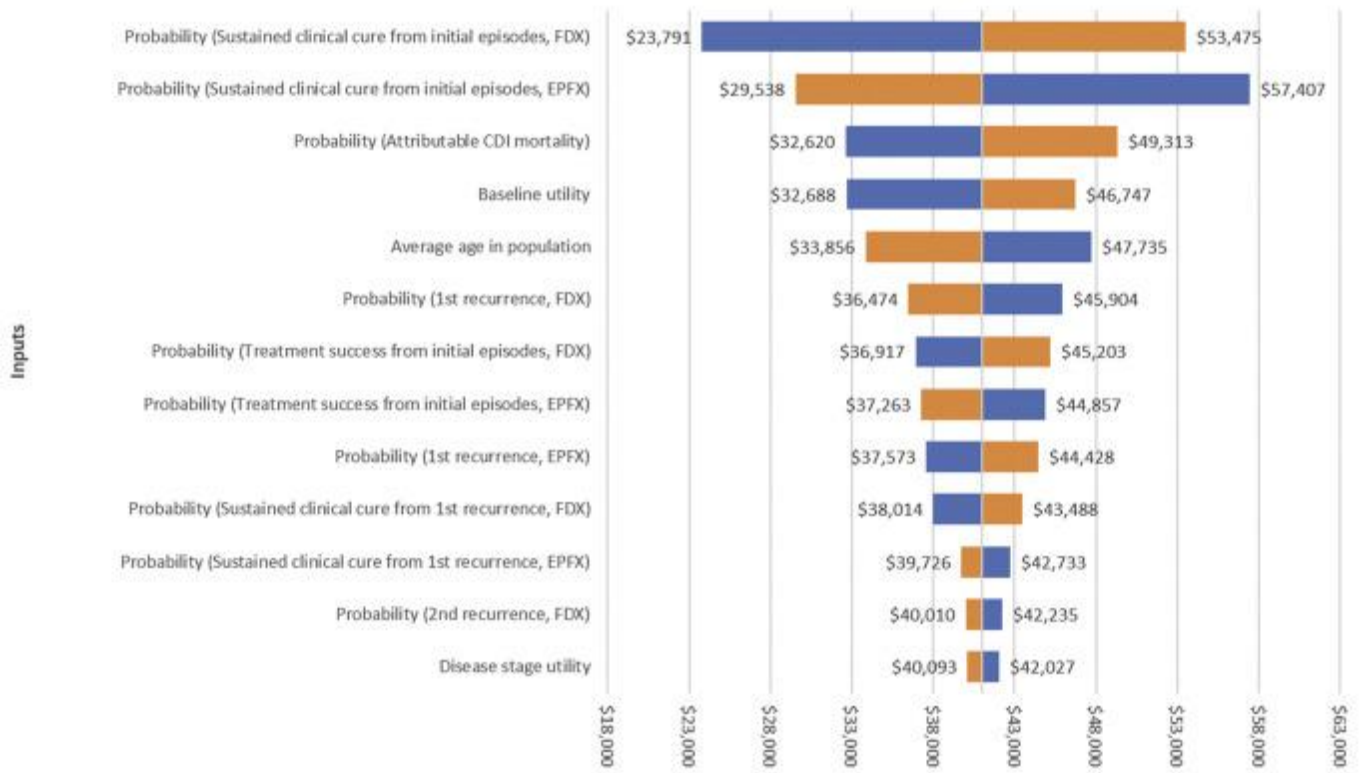

Incremental Net Monetary Benefit at Willingness-to-pay = \$150,000/Quality-adjusted Life Year

Cost-effectiveness Acceptability Curve: Extended-pulsed Fidaxomicin vs Vancomycin

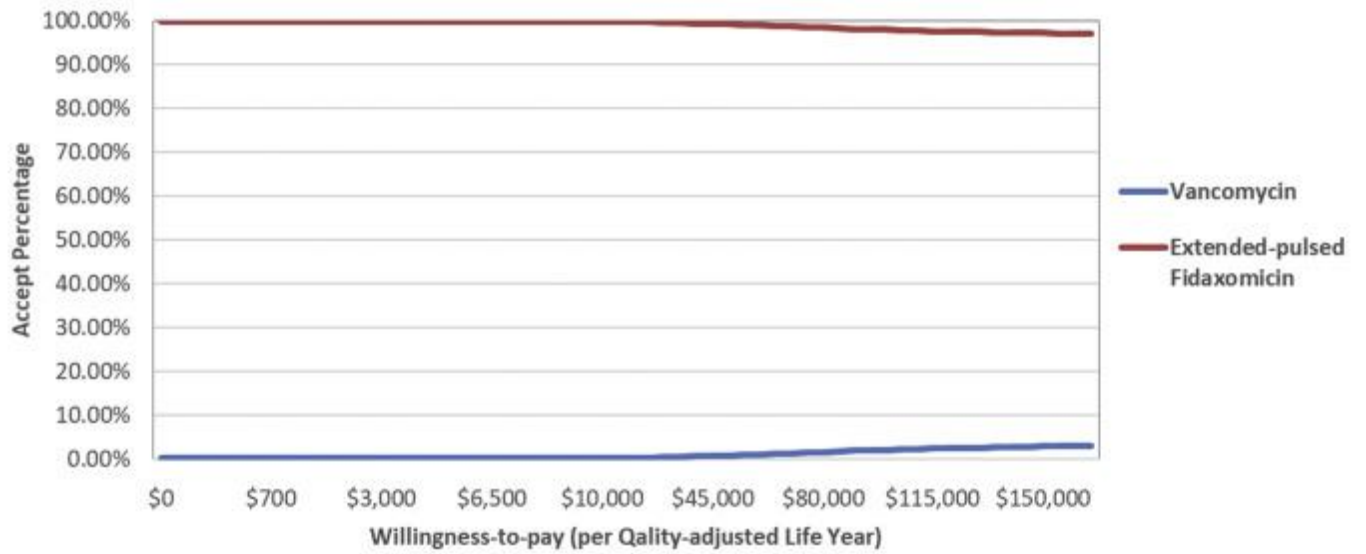



Cost-effectiveness Acceptability Curve: Standard Fidaxomicin vs Vancomycin

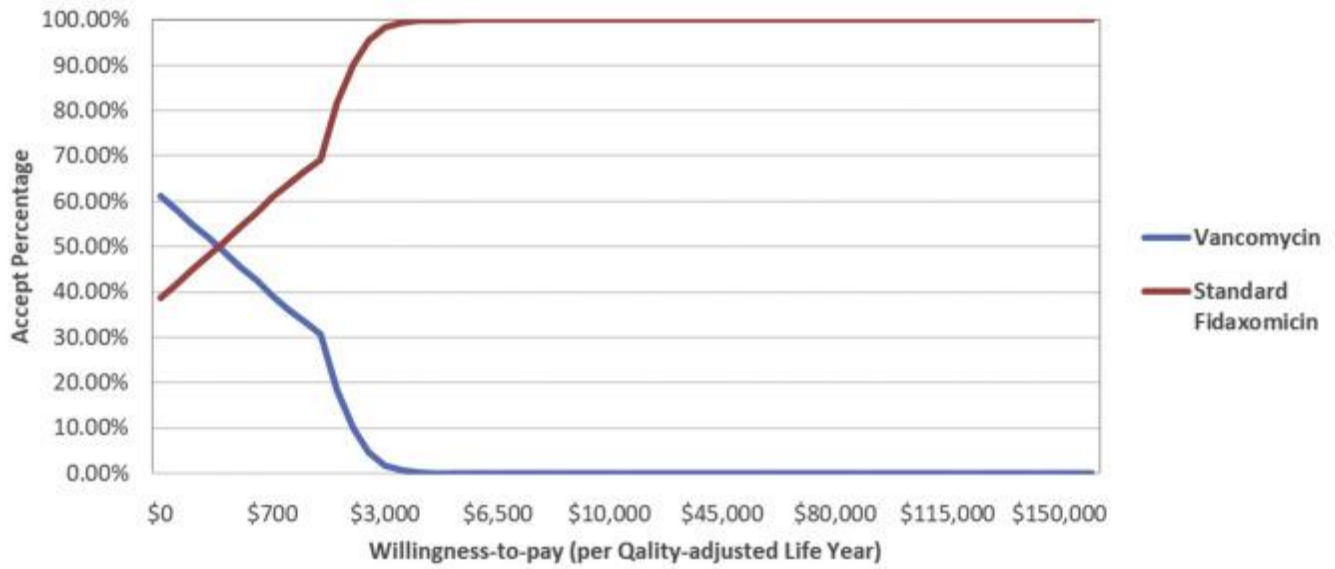

Cost-effectiveness Acceptability Curve: Bezlotoxumab plus Vancomycin vs Vancomycin

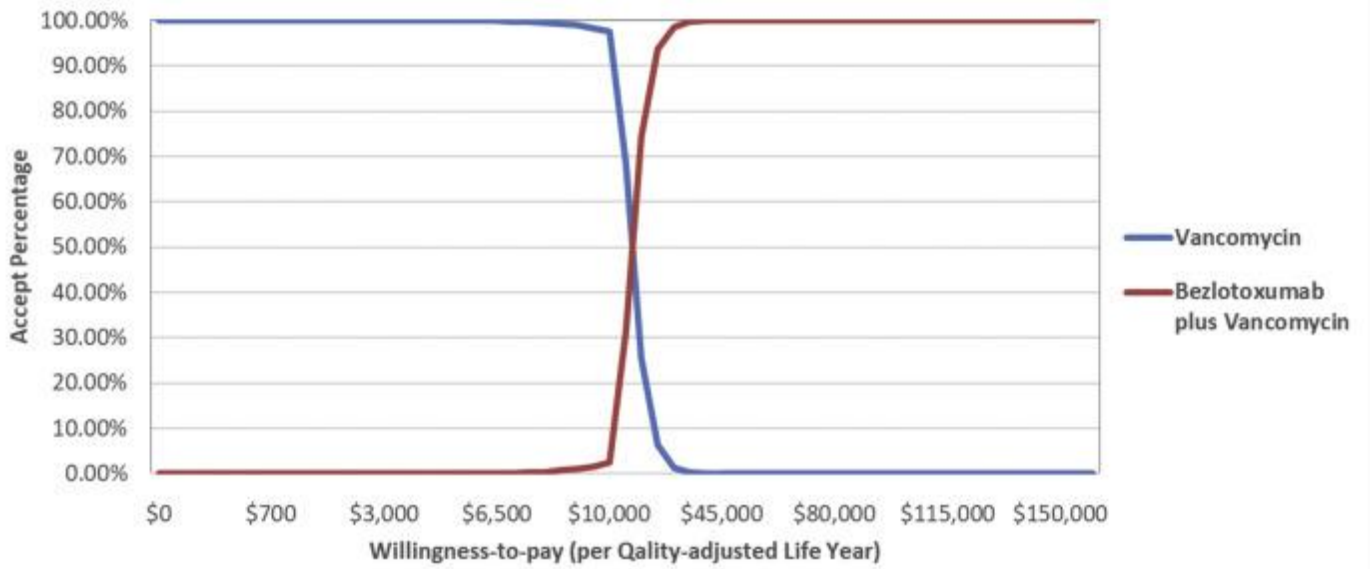

Cost-effectiveness Acceptability Curve: Standard Fidaxomicin vs Extended-pulsed Fidaxomicin

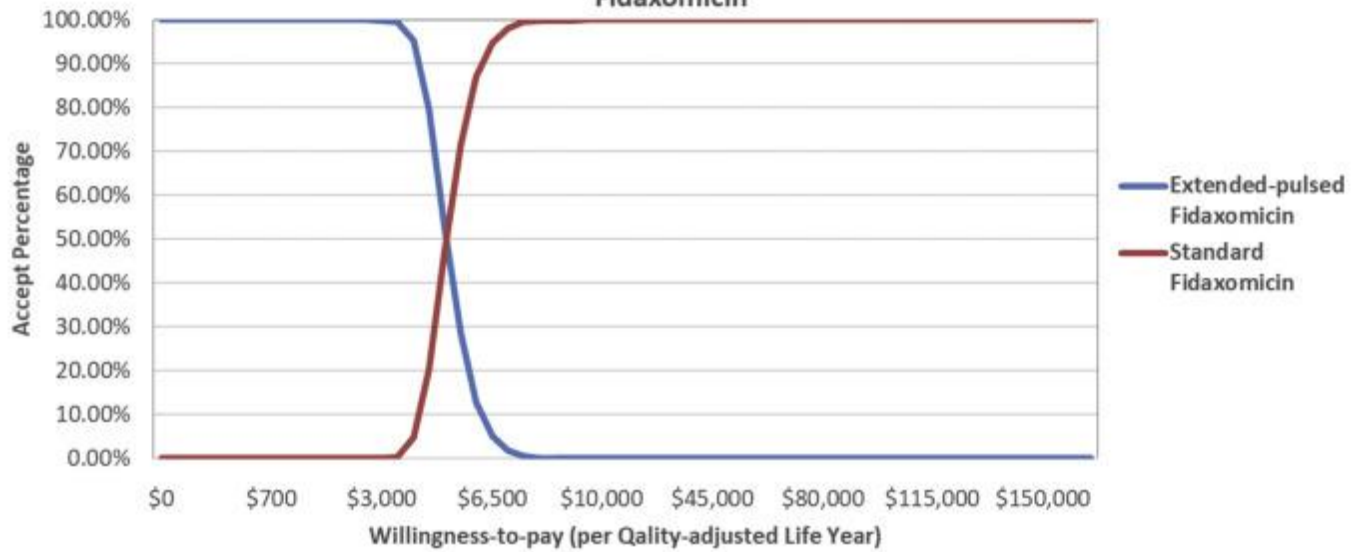

Incremental Cost-effectiveness Ratio Scatterplot: Extended-pulsed Fidaxomicin vs Vancomycin

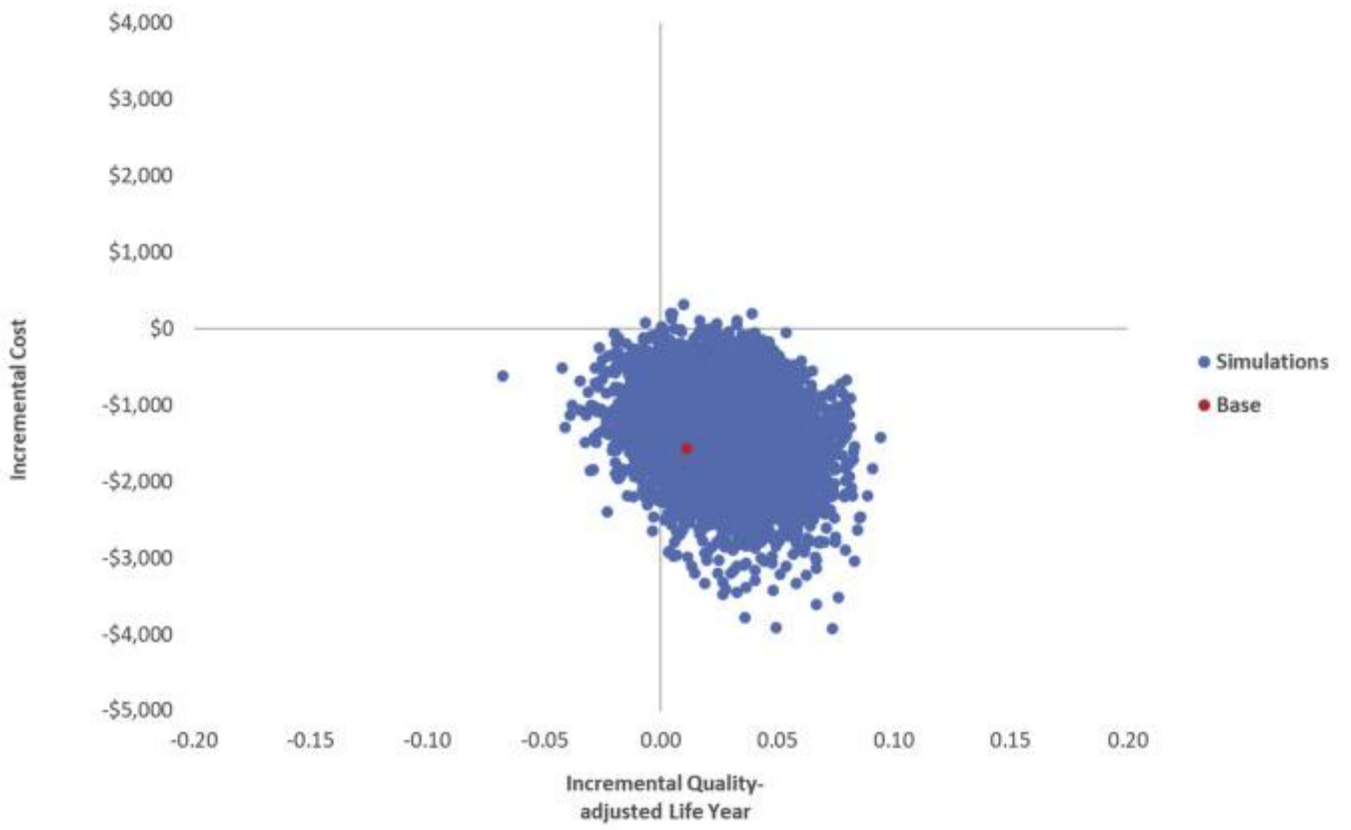

Incremental Cost-effectiveness Ratio Scatterplot: Standard Fidaxomicin vs Vancomycin

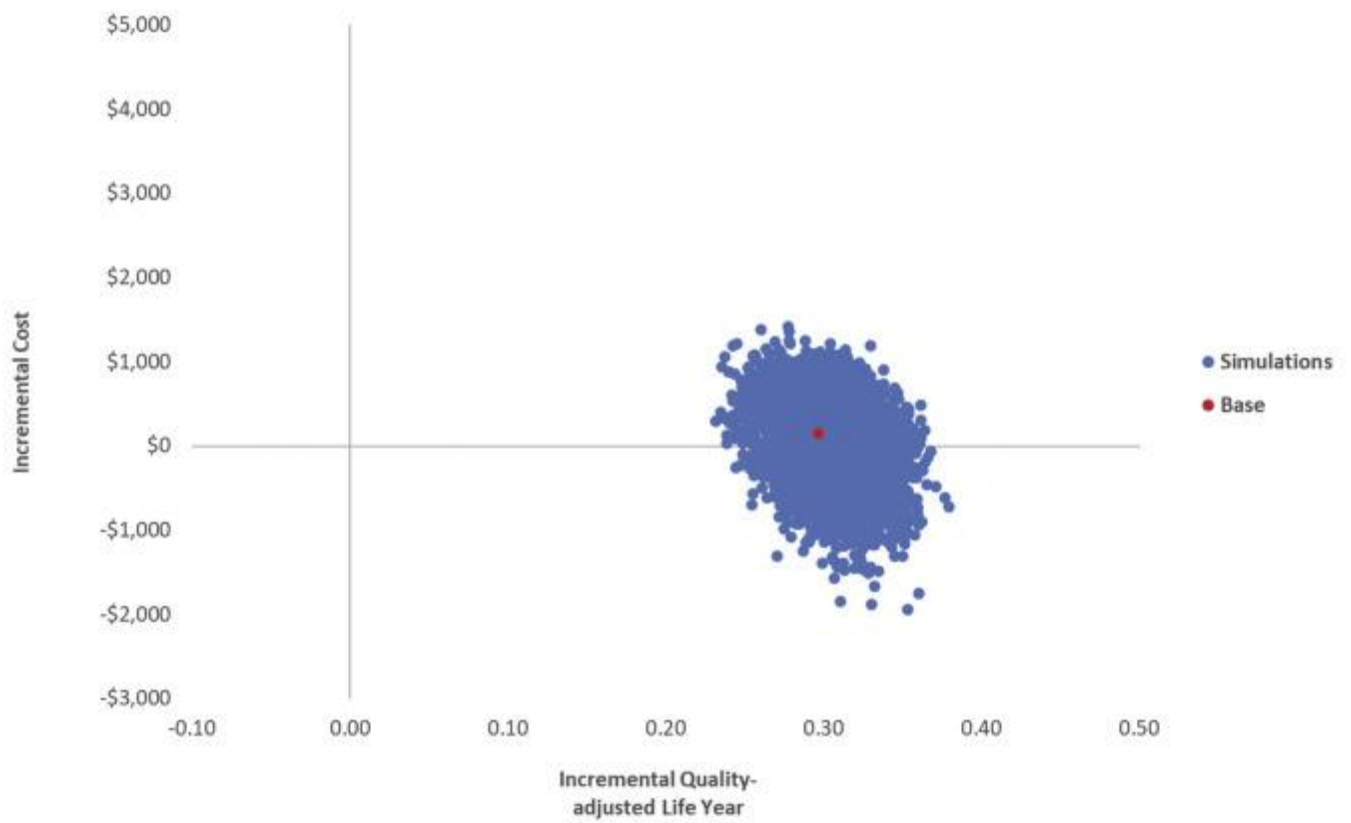

Incremental Cost-effectiveness Ratio Scatterplot: Bezlotoxumab plus Vancomycin vs Vancomycin

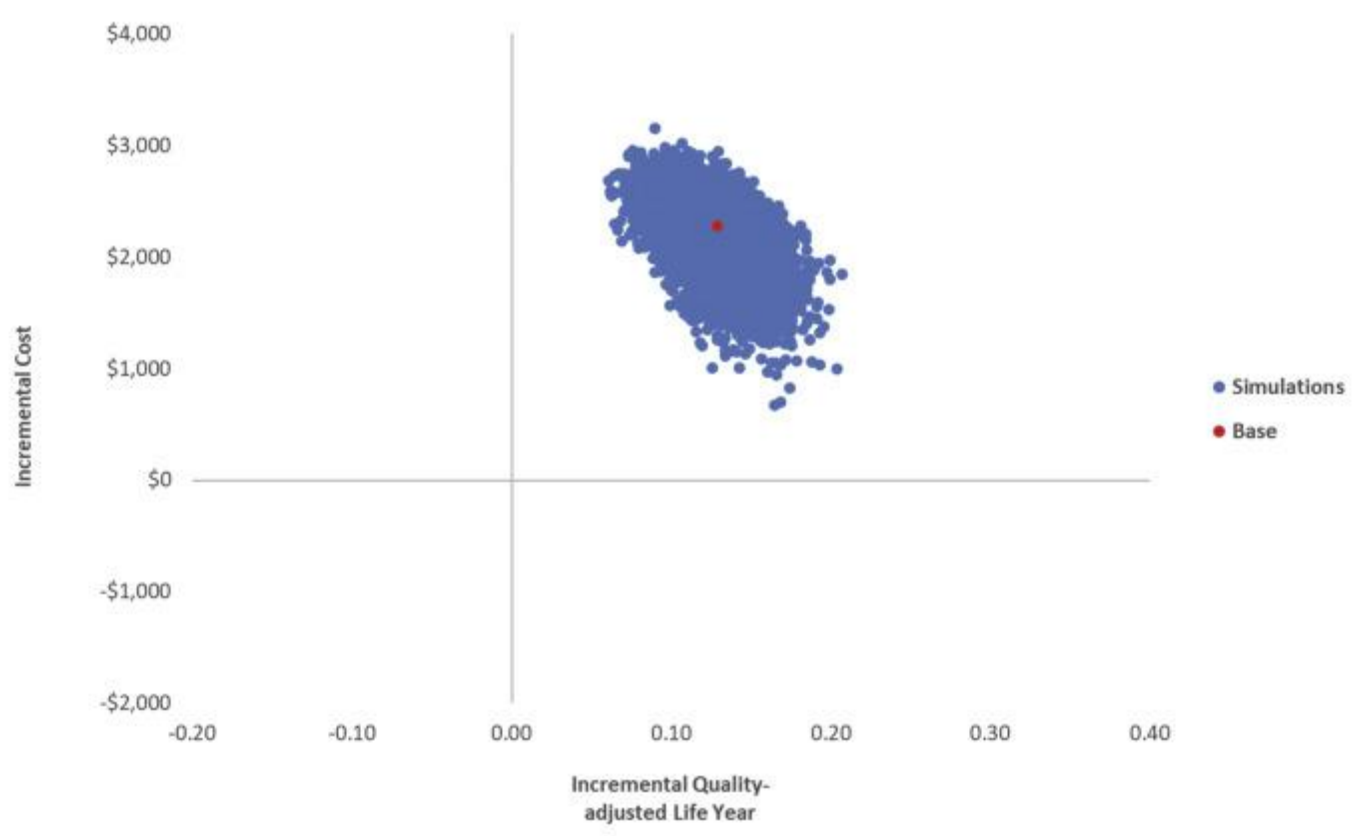

**Incremental Cost-effectiveness Ratio Scatterplot: Standard Fidaxomicin vs Extended-pulsed Fidaxomicin**

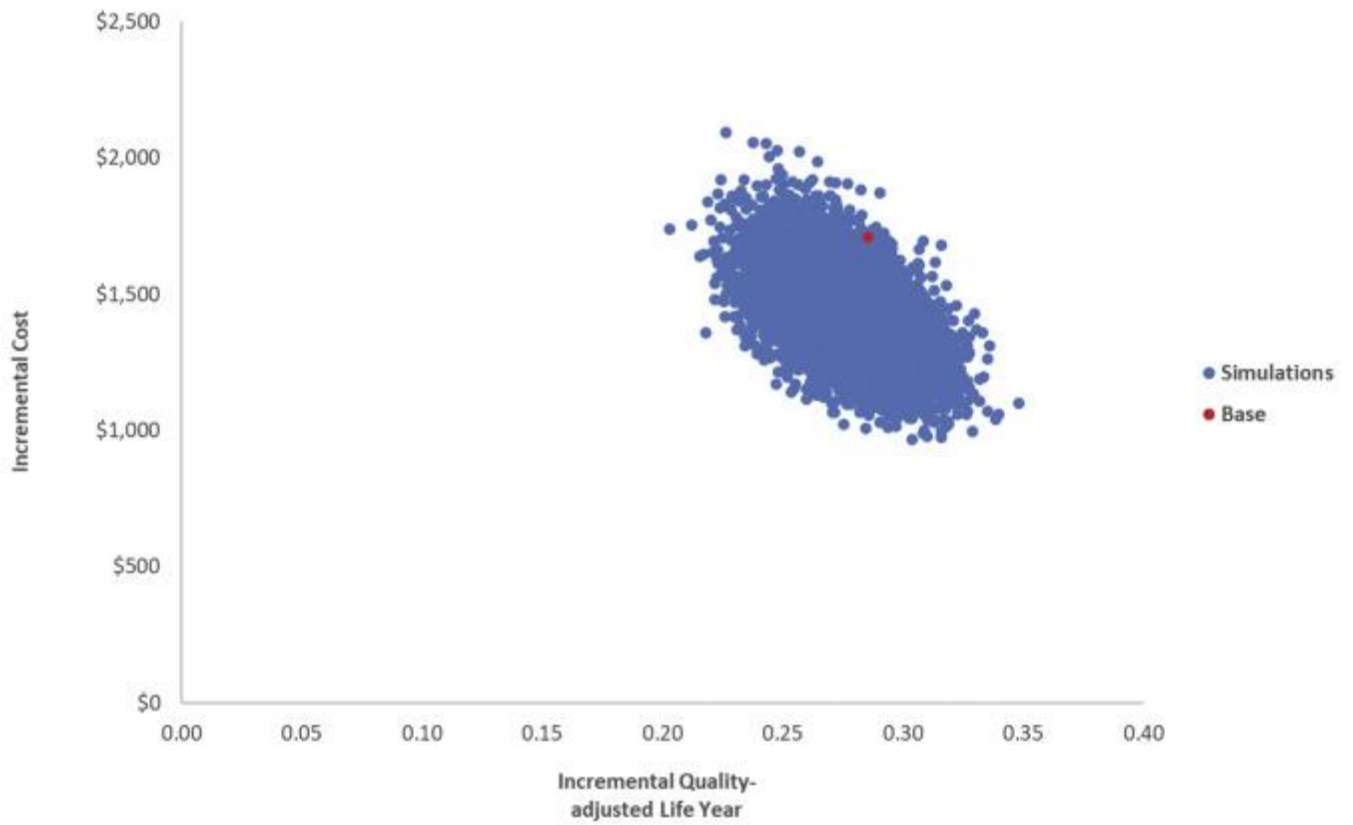

Supplement: NIHMS1825682-supplement-Technical_appendix.pdf [file NIHMS1825682-supplement-Technical_appendix.pdf]
